# Supplementary material for: Stimuli-responsive biodegradable and gadolinium-based poly[N-(2-hydroxypropyl) methacrylamide] copolymers: their potential as targeting and safe magnetic resonance imaging probes
Source: Royal Society of Chemistry journal article supplement (doi:10.1039/c6tb03253b), 2017-01-01
Supplement: c6tb03253b1.pdf [file c6tb03253b1.pdf]

## Supporting Information

### **Stimuli-Responsive Biodegradable and Gadolinium-Based Poly[N-(2-hydroxypropyl)methacrylamide] Copolymers: Potential as Targeting and Safe Magnetic Resonance Imaging Probes**

Xue Li,<sup>a,1</sup> Ling Sun,<sup>b,1</sup> Xiaoli Wei,<sup>a</sup> Qiang Luo,<sup>a</sup> Hao Cai,<sup>a</sup> Xueyuang Xiao,<sup>a</sup> Hongyan Zhu,<sup>\*,a,b</sup>  
Kui Luo<sup>a</sup>

*<sup>a</sup>Huaxi MR Research Center (HMRRRC), Department of Radiology, West China Hospital, Sichuan University, Chengdu, Sichuan 610041, China*

*<sup>b</sup>Laboratory of Stem Cell Biology, State Key Laboratory of Biotherapy, West China Hospital, Sichuan University, Chengdu, Sichuan 610041, China*

\*Corresponding author.

Prof. Zhu is to be contacted at Tel / fax: +86 28 85423503. E-mail addresse:  
hyzhu\_hmrrc@126.com

<sup>1</sup> Li X. and Sun L. contributed equally to this work.

## 1. Materials and Methods

The MWs and polydispersity (PDI) of the copolymer were tested via size-exclusion chromatography (SEC) on a Superose 6 HR10/30 column and on an ÄKTA/FPLC system (GE Healthcare). Sodium acetate buffer/acetonitrile (7:3, pH 6.5) was used as mobile phase with a corresponding flow rate of 0.4 mL/min. The copolymers were purified by SEC via a Superose 6 HR10/30 column, while the mobile phase was sodium acetate buffer/acetonitrile (7: 3, pH 6.2), and the flow rate was 2.5 mL/min, and the temperature was 4 °C. NMR spectroscopy data was obtained using a 400 MHz Bruker Advanced Spectrometer, and chemical shifts were reported in ppm on the  $\delta$  scale.

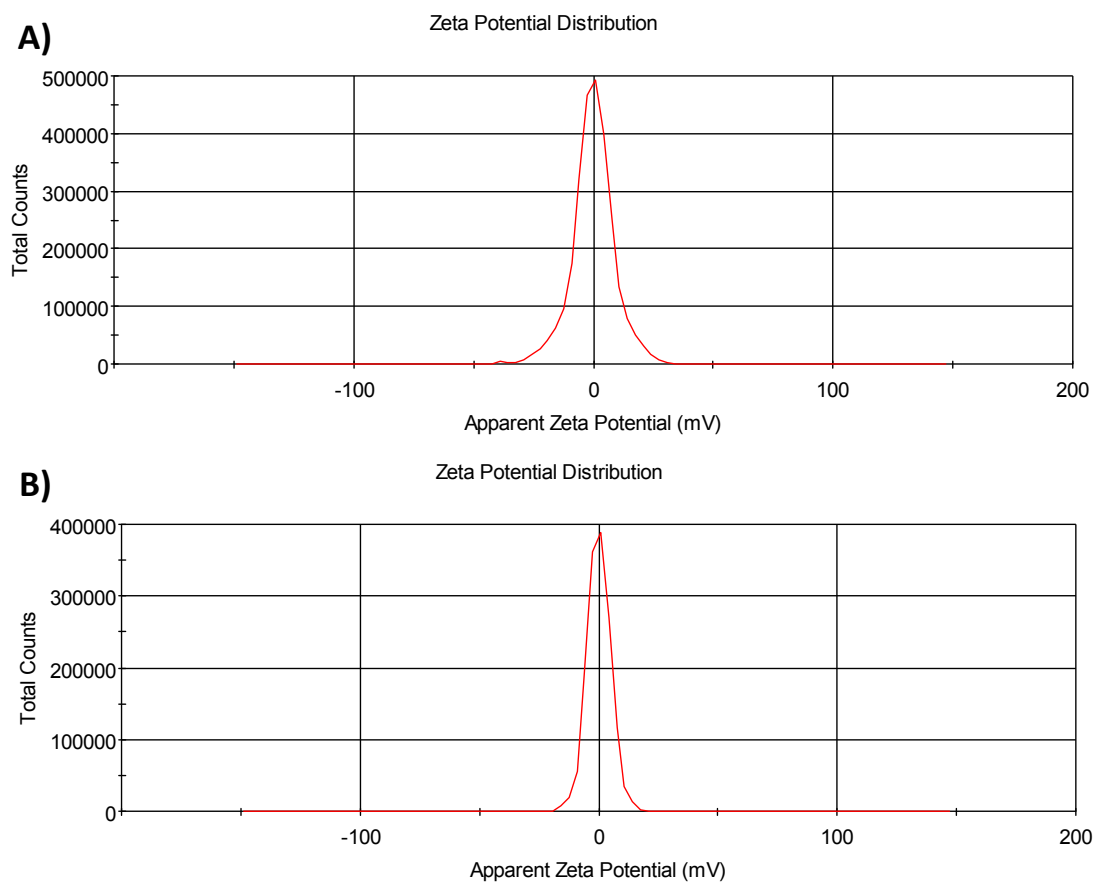

**Figure S1.** Zeta potential of pHPMA-DOTA-Gd (-0.13 mV) and pHPMA-DOTA-Gd-cRGD (0.04 mV) based nanoscale system.

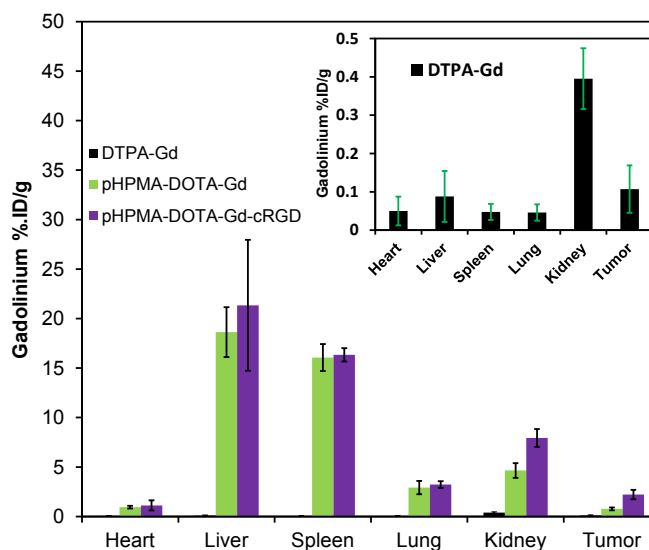

**Figure S2.** Quantitative analysis of gadolinium content of the different tissues and tumors from the nude mice with U87 tumors. The data was obtained at 24 h post-treatment with DTPA-Gd, pHPMA-DOTA-Gd and pHPMA-DOTA-Gd-cRGD [0.08 mmol Gd(III)/kg mice], respectively. The tumor size was about 3 mm in diameter. (\* $p < 0.01$  versus DTPA-Gd) ( $n = 7$ / group).

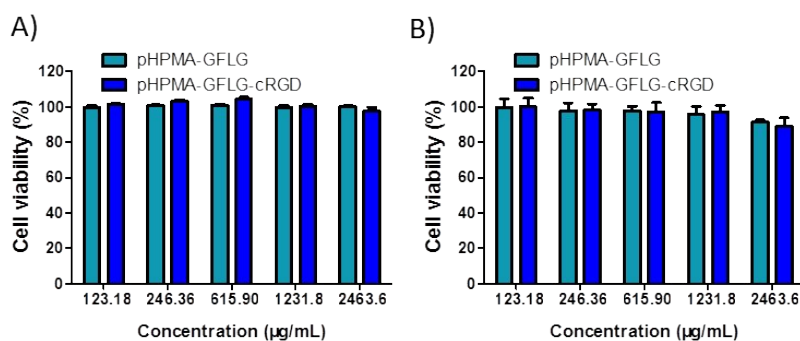

**Figure S3.** Cytotoxicity of two polymers without Gd(III) in L02 (A) and U87 (B) cell lines.

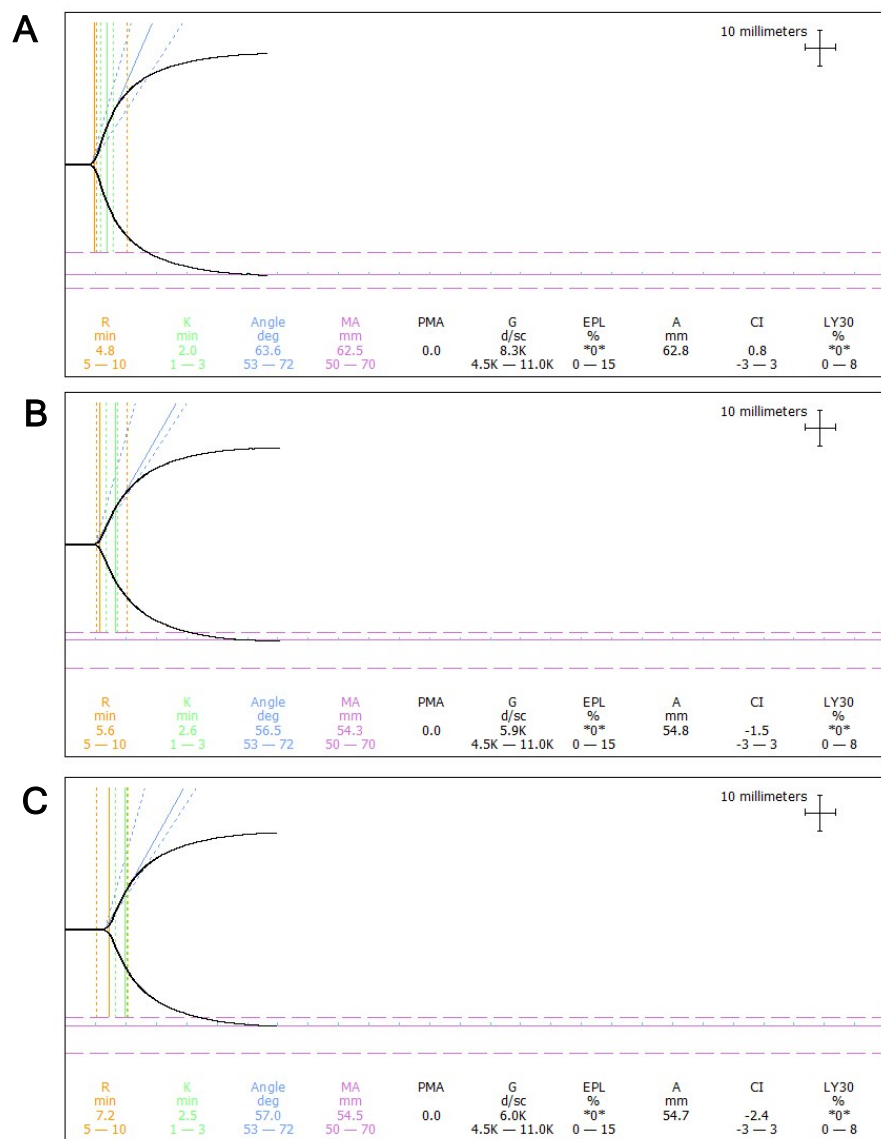

**Figure S4.** Representative thromboelastography (TEG) traces of whole blood clotting in the presence of PBS (A), pHPMA-DOTA-Gd (B) and pHPMA-DOTA-Gd-cRGD (C), respectively.

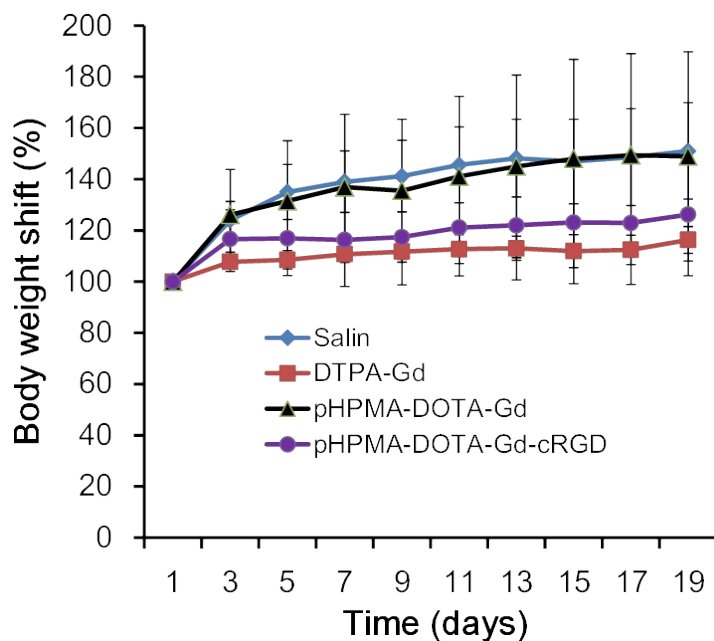

**Figure S5.** Normal animal body weight shifts post-injections of saline, clinical agent DTPA-Gd, pHPMA-DOTA-Gd and pHPMA-DOTA-Gd-cRGD conjugates up to day 19 (n=7, per group).

**Table S1.** The characterization of the pHPMA-DOTA-Gd and pHPMA-DOTA-Gd-cRGD products.

| Comp.              | MW (kDa) | PDI  | Content of thiol group (mmol/g product) | Content of cRGDyK (weight%) | gadolinium content(weight%) |
|--------------------|----------|------|-----------------------------------------|-----------------------------|-----------------------------|
| pHPMA-DOTA-Gd      | 85       | 1.18 | 0.66                                    | -                           | 6.5%                        |
| pHPMA-DOTA-Gd-cRGD | 94       | 1.20 | 0.10                                    | ~22%                        | 4.0%                        |

**Table S2.** The MW and PDI of the degraded products after incubation of conjugates (3 mg/mL) with 2.4  $\mu$ M cathepsin B in McIlvaine's buffer at 37  $^{\circ}$ C (pH 5.4).

| Comp.              | 0 h                 | 2 h                 | 5 h                 | 8 h                 | 12 h                |
|--------------------|---------------------|---------------------|---------------------|---------------------|---------------------|
| pHPMA-DOTA-Gd      | 85 kDa,<br>PDI 1.18 | 78 kDa,<br>PDI 2.94 | 49 kDa,<br>PDI 1.41 | 43 kDa,<br>PDI 1.03 | 43 kDa,<br>PDI 1.02 |
| pHPMA-DOTA-Gd-cRGD | 94 kDa,<br>PDI 1.20 | 76 kDa,<br>PDI 2.64 | 54 kDa,<br>PDI 1.45 | 43 kDa,<br>PDI 1.15 | 44 kDa,<br>PDI 1.12 |

**Table S3.** The MW and PDI of the degraded products after incubation of conjugates in PBS at 37 °C (pH 7.4).

| Comp.              | 0 h                 | 2 h                 | 5 h                 | 8 h                 | 12 h                |
|--------------------|---------------------|---------------------|---------------------|---------------------|---------------------|
| pHPMA-DOTA-Gd      | 85 kDa,<br>PDI 1.16 | 85 kDa,<br>PDI 1.17 | 84 kDa,<br>PDI 1.19 | 84 kDa,<br>PDI 1.19 | 83 kDa,<br>PDI 1.16 |
| pHPMA-DOTA-Gd-cRGD | 94 kDa,<br>PDI 1.20 | 94 kDa,<br>PDI 1.22 | 93 kDa,<br>PDI 1.22 | 93 kDa,<br>PDI 1.21 | 93 kDa,<br>PDI 1.22 |

PBS: phosphate buffered saline

**Table S4.** Clotting kinetics values of human whole blood mixed with the two conjugates.

|                    | <i>R</i> (min) | <i>K</i> (min) | $\alpha$ (deg) | <i>MA</i> (mm) |
|--------------------|----------------|----------------|----------------|----------------|
| Normal range       | 5–10           | 1–3            | 53–72          | 50–70          |
| PBS control        | 4.8            | 2.0            | 63.5           | 62.5           |
| pHPMA-DOTA-Gd      | 5.6            | 2.6            | 56.5           | 54.3           |
| pHPMA-DOTA-Gd-cRGD | 7.2            | 2.5            | 57.0           | 54.5           |
